# Supplementary material for: Heritability of Immunity Traits and Resistance of Atlantic Salmon against the Sea Louse Caligus rogercresseyi
Source: MDPI journal article supplement (doi:10.3390/biology12081078), 2023-08-02
Supplement: s1 [file s1]

# Supplementary Material

**Table S1.** Primary antibodies used in indirect ELISA.

| Marker       | Source | Dilution | Reference |
|--------------|--------|----------|-----------|
| Nkef         | Mouse  | 1:800    | [1]       |
| Tnf $\alpha$ | Mouse  | 1:500    | [2]       |
| Il-8         | Mouse  | 1:500    | [3]       |

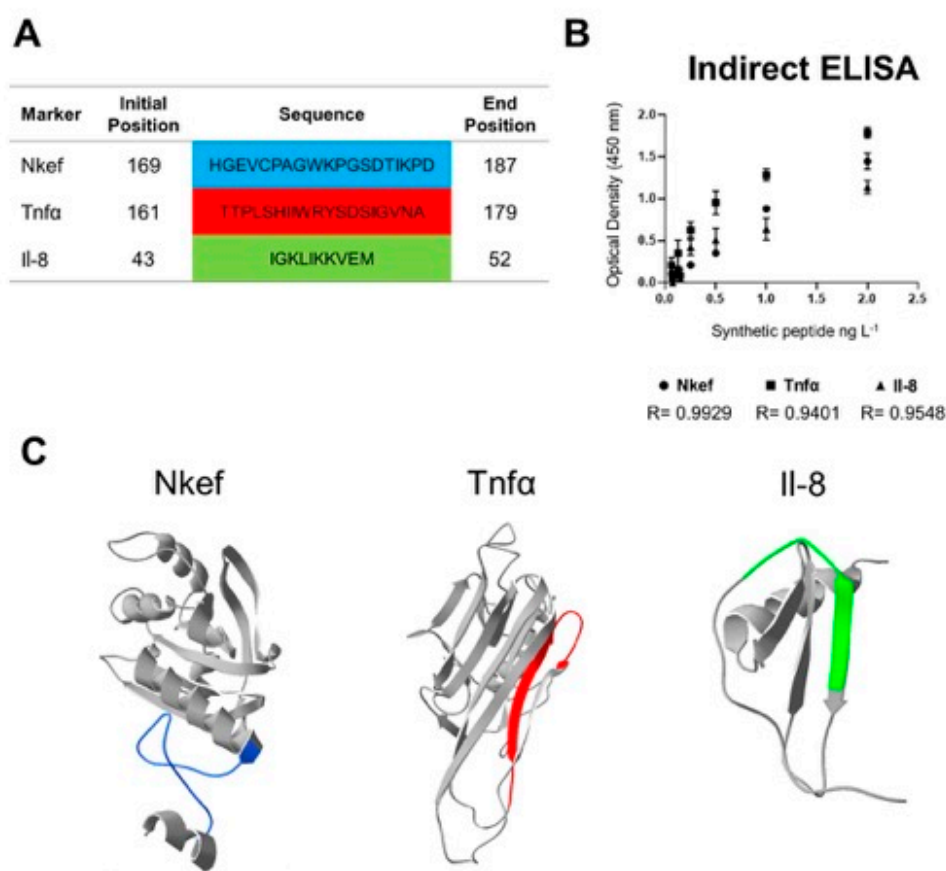

**Figure S1.** Production and validation of polyclonal antibodies against immunological markers of *Salmo salar*. **(A)** List of epitope peptides from Nkef, Tnfa and Il-8. **(B)** Calibration curve by indirect ELISA to establish the proportional relationship between the detection of the anti-epitope antibody produced (at 450 nm) and the concentration of the synthetic peptide (ng  $\mu$ L<sup>-1</sup>), R: Pearson's correlation coefficient. **(C)** Three-dimensional modeling of the epitope in the molecule by homology (Phyre2). On the left: Nkef (in blue: HGEVCPAGWKPGSDTIKPD), in the center: Tnfa (in red: TTPLSHIIWRYSDSIGVNA) and on the right.

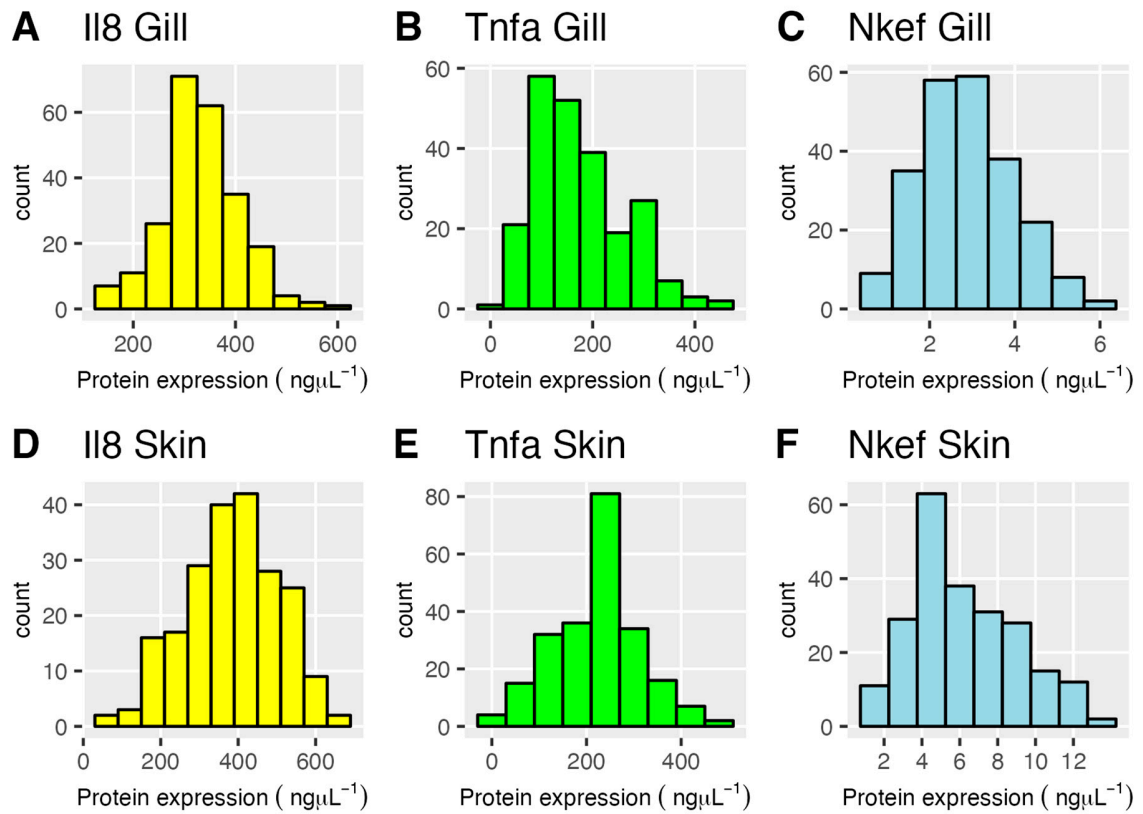

**Figure S2.** Phenotypic variation of immunity traits measured as Protein expression (ng  $\mu\text{L}^{-1}$ ) by indirect ELISA in salmon infected by sea lice (*chalimus sessile* lice) in Atlantic salmon.

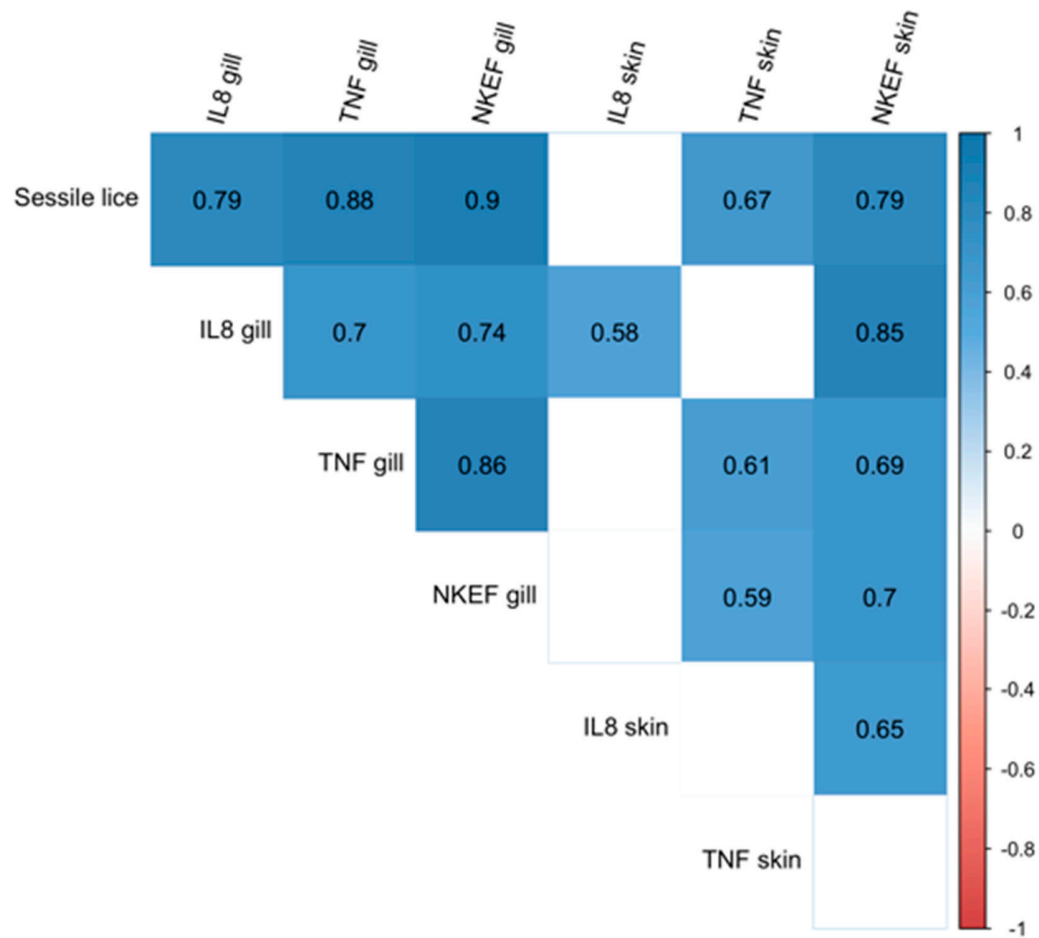

**Figure S3.** Significant ( $p < 0.05$ ) familiar correlation of immunity traits measured as Protein expression ( $\text{ng } \mu\text{l}^{-1}$ ) by indirect ELISA in salmon infected by sea lice (chalmus sessile lice) in Atlantic salmon.

## References

1. Bethke, J.; Rojas, V.; Berendsen, J.; Cardenas, C.; Guzman, F.; Gallardo, J.A.; Mercado, L. Development of a new antibody for detecting natural killer enhancing factor (NKEF)-like protein in infected salmonids. *Journal of fish diseases* **2012**, *35*, 379-388, doi:10.1111/j.1365-2761.2012.01354.x.
2. Rojas, V.; Morales-Lange, B.; Guzmán, F.; Gallardo, J.A.; Mercado, L. Immunological strategy for detecting the pro-inflammatory cytokine TNF-alpha in salmonids. *Electronic Journal of Biotechnology* **2012**, *15*, doi:10.2225/vol15-issue5-fulltext-19.
3. Santana, P.; Palacios, C.; Narváez, E.; Guzmán, F.; Gallardo, J.A.; Mercado, L. Anti-peptide antibodies: A tool for detecting IL-8 in salmonids. *Electronic Journal of Biotechnology* **2012**, *15*, doi:10.2225/vol15-issue5-fulltext-15.
